# Supplementary material for: Fatty acid DSF binds and allosterically activates histidine kinase RpfC of phytopathogenic bacterium Xanthomonas campestris pv. campestris to regulate quorum-sensing and virulence
Source: PubMed Central journal article supplement (PMC5391125; doi:10.1371/journal.ppat.1006304), 2017-04-03
Supplement: ppat.1006304.s003.pdf [file ppat.1006304.s003.pdf]

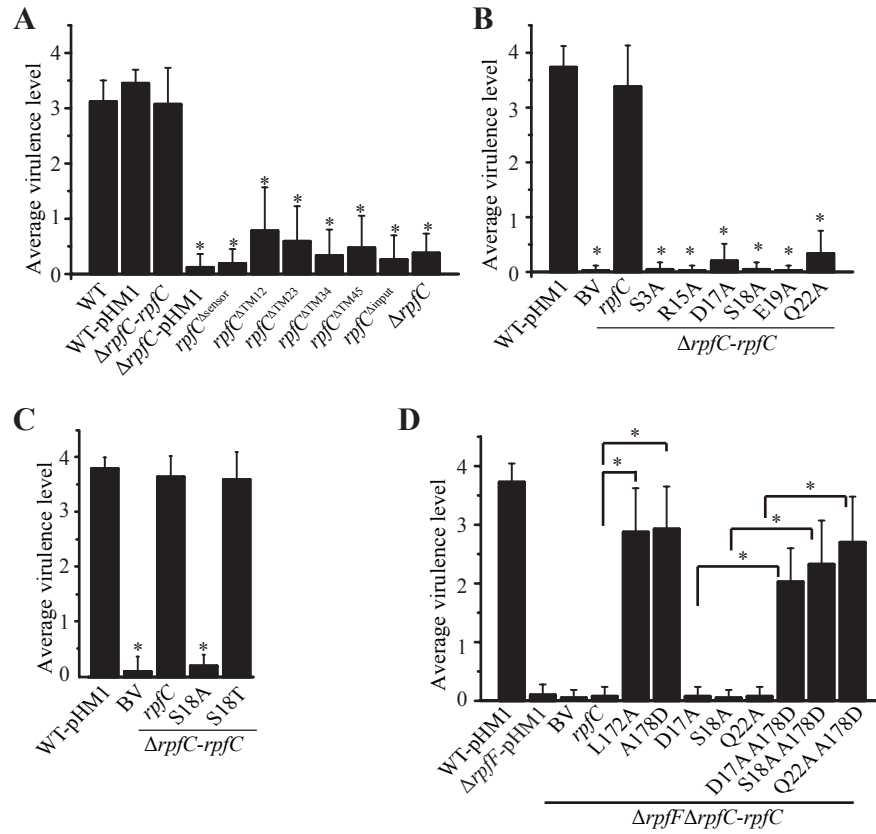

**S3 Fig. Virulence scale of bacterial strains against host cabbage.** (A) Quantification of virulence scores showed in Fig. 3A. Strain of  $\Delta rpfC$ - $rpfC$  was used as positive control. (B and C) Quantification of virulence showed in Fig. 5G. Strain of  $\Delta rpfC$ - $rpfC$  was used as positive control. (D) Quantification of virulence showed in Fig. 8H. Strains used as control in comparison were showed in the panel. In (A-D) Eight-week old cabbage (*Brassica oleracea* cv. Jingfeng No. 1) was used as host plants. Average virulence scores were estimated 10 days after inoculation ( $n = 16$ ). Standard deviation was showed as vertical bar. \* indicates significant difference compared with control strain, calculated by Student's *t*-test ( $P < 0.05$ ).
