# Supplementary material for: Fatty acid DSF binds and allosterically activates histidine kinase RpfC of phytopathogenic bacterium Xanthomonas campestris pv. campestris to regulate quorum-sensing and virulence
Source: PubMed Central journal article supplement (PMC5391125; doi:10.1371/journal.ppat.1006304), 2017-04-03
Supplement: ppat.1006304.s006.pdf [file ppat.1006304.s006.pdf]

**S1 Table. Bacterial strains and plasmids used in this study**

| Strain or plasmid                                  | Genotype or description*                                                                                                                                                                                      | Source         |
|----------------------------------------------------|---------------------------------------------------------------------------------------------------------------------------------------------------------------------------------------------------------------|----------------|
| <b>Bacterial strains</b>                           |                                                                                                                                                                                                               |                |
| <i>Escherichia coli</i> strains                    |                                                                                                                                                                                                               |                |
| <i>E. coli</i> DH5 $\alpha$                        | <i>fhuA2</i> $\Delta$ ( <i>argF-lacZ</i> )U169 <i>phoA glnV44</i> $\Phi$ 80 $\Delta$ ( <i>lacZ</i> )M15<br><i>gyrA96 recA1 relA1 endA1 thi-1 hsdR17</i>                                                       | Lab collection |
| <i>E. coli</i> BL21(DE3)                           | <i>E. coli</i> B F <sup>-</sup> <i>dcm ompT hsd(r<sub>B</sub><sup>-</sup> m<sub>B</sub><sup>-</sup>) gal <math>\lambda</math>(DE3)</i>                                                                        | Lab collection |
| <i>X. campestris</i> pv. <i>campestris</i> strains |                                                                                                                                                                                                               |                |
| Xcc 8004                                           | Wild type strain (WT), Rif <sup>r</sup>                                                                                                                                                                       | Lab collection |
| M0033                                              | $\Delta$ <i>rpfC</i> , XCC2333 ( <i>rpfC</i> ) in-frame deletion mutant, Rif <sup>r</sup>                                                                                                                     | This study     |
| M0034                                              | $\Delta$ <i>rpfF</i> , XCC2332 ( <i>rpfF</i> ) in-frame deletion mutant, Rif <sup>r</sup>                                                                                                                     | This study     |
| M0035                                              | $\Delta$ <i>rpfF</i> $\Delta$ <i>rpfC</i> , <i>rpfF</i> and <i>rpfC</i> double mutant, Rif <sup>r</sup>                                                                                                       | This study     |
| M0036                                              | $\Delta$ <i>rpfC-rpfC</i> , M0033 ( <i>rpfC</i> mutant) containing a recombinant vector pHM1:: <i>rpfC</i> , Rif <sup>r</sup> , Sp <sup>r</sup>                                                               | This study     |
| M0037                                              | <i>rpfC</i> <sup><math>\Delta</math>sensor</sup> , <i>rpfC</i> in-frame deletion mutant with 2-22 aa. coding sequences deleted, Rif <sup>r</sup>                                                              | This study     |
| M0038                                              | <i>rpfC</i> <sup><math>\Delta</math>TM1-2</sup> , <i>rpfC</i> in-frame deletion mutant with 23-72 aa. coding sequences deleted, Rif <sup>r</sup>                                                              | This study     |
| M0039                                              | <i>rpfC</i> <sup><math>\Delta</math>TM2-3</sup> , <i>rpfC</i> in-frame deletion mutant with 50-115 aa. coding sequences deleted, Rif <sup>r</sup>                                                             | This study     |
| M0040                                              | <i>rpfC</i> <sup><math>\Delta</math>TM3-4</sup> , <i>rpfC</i> in-frame deletion mutant with 93-147 aa. coding sequences deleted, Rif <sup>r</sup>                                                             | This study     |
| M0041                                              | <i>rpfC</i> <sup><math>\Delta</math>TM4-5</sup> , <i>rpfC</i> in-frame deletion mutant with 125-171 aa. coding sequences deleted, Rif <sup>r</sup>                                                            | This study     |
| M0042                                              | <i>rpfC</i> <sup><math>\Delta</math>input</sup> , <i>rpfC</i> in-frame deletion mutant with 2-171 aa. coding sequences deleted, Rif <sup>r</sup>                                                              | This study     |
| M0043                                              | $\Delta$ <i>rpfF</i> $\Delta$ <i>rpfC-rpfC</i> , M0035 ( <i>rpfF</i> and <i>rpfC</i> double in-frame deletion mutant) containing a recombinant vector pHM1:: <i>rpfC</i> , Rif <sup>r</sup> , Sp <sup>r</sup> | This study     |
| M0044                                              | $\Delta$ <i>rpfF-rpfC</i> <sup><math>\Delta</math>sensor</sup> , <i>rpfF</i> and <i>rpfC</i> <sup><math>\Delta</math>sensor</sup> double in-frame deletion mutant, Rif <sup>r</sup>                           | This study     |
| M0045                                              | $\Delta$ <i>rpfF-rpfC</i> <sup><math>\Delta</math>TM1-2</sup> , <i>rpfF</i> and <i>rpfC</i> <sup><math>\Delta</math>TM1-2</sup> double in-frame deletion mutant, Rif <sup>r</sup>                             | This study     |
| M0045                                              | $\Delta$ <i>rpfF-rpfC</i> <sup><math>\Delta</math>TM2-3</sup> , <i>rpfF</i> and <i>rpfC</i> <sup><math>\Delta</math>TM2-3</sup> double in-frame deletion mutant, Rif <sup>r</sup>                             | This study     |
| M0046                                              | $\Delta$ <i>rpfF-rpfC</i> <sup><math>\Delta</math>TM34</sup> , <i>rpfF</i> and <i>rpfC</i> <sup><math>\Delta</math>TM34</sup> double in-frame deletion mutant, Rif <sup>r</sup>                               | This study     |
| M0047                                              | $\Delta$ <i>rpfF-rpfC</i> <sup><math>\Delta</math>TM4-5</sup> , <i>rpfF</i> and <i>rpfC</i> <sup><math>\Delta</math>TM4-5</sup> double in-frame deletion mutant, Rif <sup>r</sup>                             | This study     |
| M0048                                              | $\Delta$ <i>rpfF-rpfC</i> <sub><math>\Delta</math>input</sub> , <i>rpfF</i> and <i>rpfC</i> <sub><math>\Delta</math>input</sub> double in-frame deletion mutant, Rif <sup>r</sup>                             | This study     |
| M0049                                              | $\Delta$ <i>rpfF</i> ( <i>GUS</i> ), $\Delta$ <i>rpfF</i> derivative containing a recombinant vector pHM2:: <i>PengXcc-GUS</i> , Rif <sup>r</sup> , Sp <sup>r</sup>                                           | This study     |
| M0050                                              | <i>rpfC</i> <sup><math>\Delta</math>sensor</sup> ( <i>GUS</i> ), <i>rpfC</i> <sup><math>\Delta</math>sensor</sup> derivative containing a                                                                     | This study     |

|       |                                                                                                                                                                                                                                      |            |
|-------|--------------------------------------------------------------------------------------------------------------------------------------------------------------------------------------------------------------------------------------|------------|
| M0051 | recombinant vector pHM2:: <i>PengXcc-GUS</i> , Rif <sup>r</sup> , Sp <sup>r</sup><br><i>rpfC</i> <sup>ΔTM1-2</sup> ( <i>GUS</i> ), <i>rpfC</i> <sup>ΔTM1-2</sup> derivative containing a                                             | This study |
| M0052 | recombinant vector pHM2:: <i>PengXcc-GUS</i> , Rif <sup>r</sup> , Sp <sup>r</sup><br><i>rpfC</i> <sup>ΔTM2-3</sup> ( <i>GUS</i> ), <i>rpfC</i> <sup>ΔTM2-3</sup> derivative containing a                                             | This study |
| M0053 | recombinant vector pHM2:: <i>PengXcc-GUS</i> , Rif <sup>r</sup> , Sp <sup>r</sup><br><i>rpfC</i> <sup>ΔTM3-4</sup> ( <i>GUS</i> ), <i>rpfC</i> <sup>ΔTM3-4</sup> derivative containing a                                             | This study |
| M0054 | recombinant vector pHM2:: <i>PengXcc-GUS</i> , Rif <sup>r</sup> , Sp <sup>r</sup><br><i>rpfC</i> <sup>ΔTM4-5</sup> ( <i>GUS</i> ), <i>rpfC</i> <sup>ΔTM4-5</sup> derivative containing a                                             | This study |
| M0055 | recombinant vector pHM2:: <i>PengXcc-GUS</i> , Rif <sup>r</sup> , Sp <sup>r</sup><br><i>rpfC</i> <sup>Δinput</sup> ( <i>GUS</i> ), <i>rpfC</i> <sup>Δinput</sup> derivative containing a recombinant                                 | This study |
| M0056 | <i>ΔrpfFΔrpfC(GUS)</i> , <i>ΔrpfFΔrpfC</i> derivative containing a                                                                                                                                                                   | This study |
| M0057 | recombinant vector pHM2:: <i>PengXcc-GUS</i> , Rif <sup>r</sup> , Sp <sup>r</sup><br><i>ΔrpfF- rpfC</i> <sup>Δsensor</sup> ( <i>GUS</i> ), <i>ΔrpfF- rpfC</i> <sub>Δsensor</sub> derivative                                          | This study |
| M0058 | containing a recombinant vector pHM2:: <i>PengXcc-GUS</i> , Rif <sup>r</sup> , Sp <sup>r</sup><br><i>ΔrpfF- rpfC</i> <sup>ΔTM1-2</sup> ( <i>GUS</i> ), <i>ΔrpfF- rpfC</i> <sup>ΔTM1-2</sup> derivative                               | This study |
| M0059 | containing a recombinant vector pHM2:: <i>PengXcc-GUS</i> , Rif <sup>r</sup> , Sp <sup>r</sup><br><i>ΔrpfF- rpfC</i> <sup>ΔTM3-4</sup> ( <i>GUS</i> ), <i>ΔrpfF- rpfC</i> <sup>ΔTM3-4</sup> derivative                               | This study |
| M0060 | containing a recombinant vector pHM2:: <i>PengXcc-GUS</i> , Rif <sup>r</sup> , Sp <sup>r</sup><br><i>ΔrpfF- rpfC</i> <sup>ΔTM4-5</sup> ( <i>GUS</i> ), <i>ΔrpfF- rpfC</i> <sup>ΔTM4-5</sup> derivative                               | This study |
| M0061 | containing a recombinant vector pHM2:: <i>PengXcc-GUS</i> , Rif <sup>r</sup> , Sp <sup>r</sup><br><i>ΔrpfF-GUS</i> , transcriptional fusion. a <i>gusE</i> gene and its own                                                          | This study |
| M0062 | SD sequence was fused into the DNA region between<br><i>PengXcc</i> promoter and <i>engXcc</i> in the background of <i>ΔrpfF</i><br><i>ΔrpfFΔrpfC-GUS</i> , transcriptional fusion. a <i>gusE</i> gene and its                       | This study |
| M0063 | own SD sequence was fused into the DNA region between<br><i>PengXcc</i> promoter and <i>engXcc</i> in the background of<br><i>ΔrpfF-ΔrpfC</i><br><i>ΔrpfFΔrpfC-rpfC</i> <sup>K2A</sup> - <i>GUS</i> , M0062 containing a recombinant | This study |
| M0064 | vector pHM1:: <i>rpfC</i> <sup>K2A</sup> , Rif <sup>r</sup> , Sp <sup>r</sup><br><i>ΔrpfFΔrpfC-rpfC</i> <sup>S3A</sup> - <i>GUS</i> , M0062 containing a recombinant                                                                 | This study |
| M0065 | vector pHM1:: <i>rpfC</i> <sup>S3A</sup> , Rif <sup>r</sup> , Sp <sup>r</sup><br><i>ΔrpfFΔrpfC-rpfC</i> <sup>P4A</sup> - <i>GUS</i> , M0062 containing a recombinant                                                                 | This study |
| M0066 | vector pHM1:: <i>rpfC</i> <sup>P4A</sup> , Rif <sup>r</sup> , Sp <sup>r</sup><br><i>ΔrpfFΔrpfC-rpfC</i> <sup>L5A</sup> - <i>GUS</i> , M0062 containing a recombinant                                                                 | This study |
| M0067 | vector pHM1:: <i>rpfC</i> <sup>L5A</sup> , Rif <sup>r</sup> , Sp <sup>r</sup><br><i>ΔrpfFΔrpfC-rpfC</i> <sup>P6A</sup> - <i>GUS</i> , M0062 containing a recombinant                                                                 | This study |
| M0068 | vector pHM1:: <i>rpfC</i> <sup>P6A</sup> , Rif <sup>r</sup> , Sp <sup>r</sup><br><i>ΔrpfFΔrpfC-rpfC</i> <sup>W7A</sup> - <i>GUS</i> , M0062 containing a recombinant                                                                 | This study |
| M0069 | vector pHM1:: <i>rpfC</i> <sup>W7A</sup> , Rif <sup>r</sup> , Sp <sup>r</sup><br><i>ΔrpfFΔrpfC-rpfC</i> <sup>L8A</sup> - <i>GUS</i> , M0062 containing a recombinant                                                                 | This study |

|       |                                                                                                                                                          |            |
|-------|----------------------------------------------------------------------------------------------------------------------------------------------------------|------------|
|       | vector pHM1:: <i>rpfC</i> <sup>L8A</sup> , Rif <sup>r</sup> , Sp <sup>r</sup>                                                                            |            |
| M0070 | $\Delta rpfF\Delta rpfC-rpfC^{K9A}-GUS$ , M0062 containing a recombinant vector pHM1:: <i>rpfC</i> <sup>K9A</sup> , Rif <sup>r</sup> , Sp <sup>r</sup>   | This study |
| M0071 | $\Delta rpfF\Delta rpfC-rpfC^{R10A}-GUS$ , M0062 containing a recombinant vector pHM1:: <i>rpfC</i> <sup>R10A</sup> , Rif <sup>r</sup> , Sp <sup>r</sup> | This study |
| M0072 | $\Delta rpfF\Delta rpfC-rpfC^{R11A}-GUS$ , M0062 containing a recombinant vector pHM1:: <i>rpfC</i> <sup>R11A</sup> , Rif <sup>r</sup> , Sp <sup>r</sup> | This study |
| M0073 | $\Delta rpfF\Delta rpfC-rpfC^{L12A}-GUS$ , M0062 containing a recombinant vector pHM1:: <i>rpfC</i> <sup>L12A</sup> , Rif <sup>r</sup> , Sp <sup>r</sup> | This study |
| M0074 | $\Delta rpfF\Delta rpfC-rpfC^{S13A}-GUS$ , M0062 containing a recombinant vector pHM1:: <i>rpfC</i> <sup>S13A</sup> , Rif <sup>r</sup> , Sp <sup>r</sup> | This study |
| M0075 | $\Delta rpfF\Delta rpfC-rpfC^{G14A}-GUS$ , M0062 containing a recombinant vector pHM1:: <i>rpfC</i> <sup>G14A</sup> , Rif <sup>r</sup> , Sp <sup>r</sup> | This study |
| M0076 | $\Delta rpfF\Delta rpfC-rpfC^{R15A}-GUS$ , M0062 containing a recombinant vector pHM1:: <i>rpfC</i> <sup>R15A</sup> , Rif <sup>r</sup> , Sp <sup>r</sup> | This study |
| M0077 | $\Delta rpfF\Delta rpfC-rpfC^{A16D}-GUS$ , M0062 containing a recombinant vector pHM1:: <i>rpfC</i> <sup>A16D</sup> , Rif <sup>r</sup> , Sp <sup>r</sup> | This study |
| M0078 | $\Delta rpfF\Delta rpfC-rpfC^{D17A}-GUS$ , M0062 containing a recombinant vector pHM1:: <i>rpfC</i> <sup>D17A</sup> , Rif <sup>r</sup> , Sp <sup>r</sup> | This study |
| M0079 | $\Delta rpfF\Delta rpfC-rpfC^{S18A}-GUS$ , M0062 containing a recombinant vector pHM1:: <i>rpfC</i> <sup>S18A</sup> , Rif <sup>r</sup> , Sp <sup>r</sup> | This study |
| M0080 | $\Delta rpfF\Delta rpfC-rpfC^{E19A}-GUS$ , M0062 containing a recombinant vector pHM1:: <i>rpfC</i> <sup>E19A</sup> , Rif <sup>r</sup> , Sp <sup>r</sup> | This study |
| M0081 | $\Delta rpfF\Delta rpfC-rpfC^{H20A}-GUS$ , M0062 containing a recombinant vector pHM1:: <i>rpfC</i> <sup>H20A</sup> , Rif <sup>r</sup> , Sp <sup>r</sup> | This study |
| M0082 | $\Delta rpfF\Delta rpfC-rpfC^{A21D}-GUS$ , M0062 containing a recombinant vector pHM1:: <i>rpfC</i> <sup>A21D</sup> , Rif <sup>r</sup> , Sp <sup>r</sup> | This study |
| M0083 | $\Delta rpfF\Delta rpfC-rpfC^{Q22A}-GUS$ , M0062 containing a recombinant vector pHM1:: <i>rpfC</i> <sup>Q22A</sup> , Rif <sup>r</sup> , Sp <sup>r</sup> | This study |
| M0084 | $\Delta rpfF\Delta rpfC-rpfC-GUS$ , M0062 containing a recombinant vector pHM1:: <i>rpfC</i> , Rif <sup>r</sup> , Sp <sup>r</sup>                        | This study |
| M0085 | $\Delta rpfC-rpfC^{K2A}$ , M0033 containing a recombinant vector pHM1:: <i>rpfC</i> <sup>K2A</sup> , Rif <sup>r</sup> , Sp <sup>r</sup>                  | This study |
| M0086 | $\Delta rpfC-rpfC^{S3A}$ , M0033 containing a recombinant vector pHM1:: <i>rpfC</i> <sup>S3A</sup> , Rif <sup>r</sup> , Sp <sup>r</sup>                  | This study |
| M0087 | $\Delta rpfC-rpfC^{P4A}$ , M0033 containing a recombinant vector pHM1:: <i>rpfC</i> <sup>P4A</sup> , Rif <sup>r</sup> , Sp <sup>r</sup>                  | This study |
| M0088 | $\Delta rpfC-rpfC^{L5A}$ , M0033 containing a recombinant vector pHM1:: <i>rpfC</i> <sup>L5A</sup> , Rif <sup>r</sup> , Sp <sup>r</sup>                  | This study |
| M0089 | $\Delta rpfC-rpfC^{P6A}$ , M0033 containing a recombinant vector pHM1:: <i>rpfC</i> <sup>P6A</sup> , Rif <sup>r</sup> , Sp <sup>r</sup>                  | This study |
| M0090 | $\Delta rpfC-rpfC^{W7A}$ , M0033 containing a recombinant vector pHM1:: <i>rpfC</i> <sup>W7A</sup> , Rif <sup>r</sup> , Sp <sup>r</sup>                  | This study |
| M0091 | $\Delta rpfC-rpfC^{L8A}$ , M0033 containing a recombinant vector pHM1:: <i>rpfC</i> <sup>L8A</sup> , Rif <sup>r</sup> , Sp <sup>r</sup>                  | This study |

|       |                                                                                                                                            |            |
|-------|--------------------------------------------------------------------------------------------------------------------------------------------|------------|
| M0092 | $\Delta rpfC-rpfC^{K9A}$ , M0033 containing a recombinant vector pHM1:: $rpfC^{K9A}$ , Rif <sup>r</sup> , Sp <sup>r</sup>                  | This study |
| M0093 | $\Delta rpfC-rpfC^{R10A}$ , M0033 containing a recombinant vector pHM1:: $rpfC^{R10A}$ , Rif <sup>r</sup> , Sp <sup>r</sup>                | This study |
| M0094 | $\Delta rpfC-rpfC^{R11A}$ , M0033 containing a recombinant vector pHM1:: $rpfC^{R11A}$ , Rif <sup>r</sup> , Sp <sup>r</sup>                | This study |
| M0095 | $\Delta rpfC-rpfC^{L12A}$ , M0033 containing a recombinant vector pHM1:: $rpfC^{L12A}$ , Rif <sup>r</sup> , Sp <sup>r</sup>                | This study |
| M0096 | $\Delta rpfC-rpfC^{S13A}$ , M0033 containing a recombinant vector pHM1:: $rpfC^{S13A}$ , Rif <sup>r</sup> , Sp <sup>r</sup>                | This study |
| M0097 | $\Delta rpfC-rpfC^{G14A}$ , M0033 containing a recombinant vector pHM1:: $rpfC^{G14A}$ , Rif <sup>r</sup> , Sp <sup>r</sup>                | This study |
| M0098 | $\Delta rpfC-rpfC^{R15A}$ , M0033 containing a recombinant vector pHM1:: $rpfC^{R15A}$ , Rif <sup>r</sup> , Sp <sup>r</sup>                | This study |
| M0099 | $\Delta rpfC-rpfC^{A16D}$ , M0033 containing a recombinant vector pHM1:: $rpfC^{A16D}$ , Rif <sup>r</sup> , Sp <sup>r</sup>                | This study |
| M0100 | $\Delta rpfC-rpfC^{D17A}$ , M0033 containing a recombinant vector pHM1:: $rpfC^{D17A}$ , Rif <sup>r</sup> , Sp <sup>r</sup>                | This study |
| M0101 | $\Delta rpfC-rpfC^{S18A}$ , M0033 containing a recombinant vector pHM1:: $rpfC^{S18A}$ , Rif <sup>r</sup> , Sp <sup>r</sup>                | This study |
| M0102 | $\Delta rpfC-rpfC^{E19A}$ , M0033 containing a recombinant vector pHM1:: $rpfC^{E19A}$ , Rif <sup>r</sup> , Sp <sup>r</sup>                | This study |
| M0103 | $\Delta rpfC-rpfC^{H20A}$ , M0033 containing a recombinant vector pHM1:: $rpfC^{H20A}$ , Rif <sup>r</sup> , Sp <sup>r</sup>                | This study |
| M0104 | $\Delta rpfC-rpfC^{A21D}$ , M0033 containing a recombinant vector pHM1:: $rpfC^{A21D}$ , Rif <sup>r</sup> , Sp <sup>r</sup>                | This study |
| M0105 | $\Delta rpfC-rpfC^{Q22A}$ , M0033 containing a recombinant vector pHM1:: $rpfC^{Q22A}$ , Rif <sup>r</sup> , Sp <sup>r</sup>                | This study |
| M0106 | $\Delta rpfF\Delta rpfC-rpfC^{R15K}-GUS$ , M0062 containing a recombinant vector pHM1:: $rpfC^{R15K}$ , Rif <sup>r</sup> , Sp <sup>r</sup> | This study |
| M0107 | $\Delta rpfF\Delta rpfC-rpfC^{R15H}-GUS$ , M0062 containing a recombinant vector pHM1:: $rpfC^{R15H}$ , Rif <sup>r</sup> , Sp <sup>r</sup> | This study |
| M0108 | $\Delta rpfF\Delta rpfC-rpfC^{A16V}-GUS$ , M0062 containing a recombinant vector pHM1:: $rpfC^{A16V}$ , Rif <sup>r</sup> , Sp <sup>r</sup> | This study |
| M0109 | $\Delta rpfF\Delta rpfC-rpfC^{A16G}-GUS$ , M0062 containing a recombinant vector pHM1:: $rpfC^{A16G}$ , Rif <sup>r</sup> , Sp <sup>r</sup> | This study |
| M0110 | $\Delta rpfF\Delta rpfC-rpfC^{D17E}-GUS$ , M0062 containing a recombinant vector pHM1:: $rpfC^{D17E}$ , Rif <sup>r</sup> , Sp <sup>r</sup> | This study |
| M0111 | $\Delta rpfF\Delta rpfC-rpfC^{D17N}-GUS$ , M0062 containing a recombinant vector pHM1:: $rpfC^{D17N}$ , Rif <sup>r</sup> , Sp <sup>r</sup> | This study |
| M0112 | $\Delta rpfF\Delta rpfC-rpfCE19D-GUS$ , M0062 containing a recombinant vector pHM1:: $rpfC^{E19D}$ , Rif <sup>r</sup> , Sp <sup>r</sup>    | This study |
| M0113 | $\Delta rpfF\Delta rpfC-rpfC^{E19Q}-GUS$ , M0062 containing a recombinant vector pHM1:: $rpfC^{E19Q}$ , Rif <sup>r</sup> , Sp <sup>r</sup> | This study |
| M0114 | $\Delta rpfF\Delta rpfC-rpfC^{A21V}-GUS$ , M0062 containing a                                                                              | This study |

|       |                                                                                                                                                                                    |            |
|-------|------------------------------------------------------------------------------------------------------------------------------------------------------------------------------------|------------|
| M0115 | recombinant vector pHM1:: <i>rpfC</i> <sup>A21V</sup> , Rif <sup>r</sup> , Sp <sup>r</sup><br><i>ΔrpfFΔrpfC-rpfC</i> <sup>A21G</sup> - <i>GUS</i> , M0062 containing a             | This study |
| M0116 | recombinant vector pHM1:: <i>rpfC</i> <sup>A21G</sup> , Rif <sup>r</sup> , Sp <sup>r</sup><br><i>ΔrpfFΔrpfC-rpfC</i> <sup>Q22N</sup> - <i>GUS</i> , M0062 containing a             | This study |
| M0117 | recombinant vector pHM1:: <i>rpfC</i> <sup>Q22N</sup> , Rif <sup>r</sup> , Sp <sup>r</sup><br><i>ΔrpfFΔrpfC-rpfC</i> <sup>Q22E</sup> - <i>GUS</i> , M0062 containing a             | This study |
| M0118 | recombinant vector pHM1:: <i>rpfC</i> <sup>Q22E</sup> , Rif <sup>r</sup> , Sp <sup>r</sup><br><i>ΔrpfFΔrpfC-rpfC</i> <sup>S18N</sup> - <i>GUS</i> , M0062 containing a             | This study |
| M0119 | recombinant vector pHM1:: <i>rpfC</i> <sup>S18N</sup> , Rif <sup>r</sup> , Sp <sup>r</sup><br><i>ΔrpfFΔrpfC-rpfC</i> <sup>S18Q</sup> - <i>GUS</i> , M0062 containing a             | This study |
| M0120 | recombinant vector pHM1:: <i>rpfC</i> <sup>S18Q</sup> , Rif <sup>r</sup> , Sp <sup>r</sup><br><i>ΔrpfFΔrpfC-rpfC</i> <sup>S18D</sup> - <i>GUS</i> , M0062 containing a             | This study |
| M0121 | recombinant vector pHM1:: <i>rpfC</i> <sup>S18D</sup> , Rif <sup>r</sup> , Sp <sup>r</sup><br><i>ΔrpfFΔrpfC-rpfC</i> <sup>S18E</sup> - <i>GUS</i> , M0062 containing a recombinant | This study |
| M0122 | vector pHM1:: <i>rpfC</i> <sup>S18E</sup> , Rif <sup>r</sup> , Sp <sup>r</sup><br><i>ΔrpfFΔrpfC-rpfC</i> <sup>S18K</sup> - <i>GUS</i> , M0062 containing a                         | This study |
| M0123 | recombinant vector pHM1:: <i>rpfC</i> <sup>S18K</sup> , Rif <sup>r</sup> , Sp <sup>r</sup><br><i>ΔrpfFΔrpfC-rpfC</i> <sup>S18R</sup> - <i>GUS</i> , M0062 containing a             | This study |
| M0124 | recombinant vector pHM1:: <i>rpfC</i> <sup>S18R</sup> , Rif <sup>r</sup> , Sp <sup>r</sup><br><i>ΔrpfFΔrpfC-rpfC</i> <sup>S18H</sup> - <i>GUS</i> , M0062 containing a             | This study |
| M0125 | recombinant vector pHM1:: <i>rpfC</i> <sup>S18H</sup> , Rif <sup>r</sup> , Sp <sup>r</sup><br><i>ΔrpfFΔrpfC-rpfC</i> <sup>S18G</sup> - <i>GUS</i> , M0062 containing a             | This study |
| M0126 | recombinant vector pHM1:: <i>rpfC</i> <sup>S18G</sup> , Rif <sup>r</sup> , Sp <sup>r</sup><br><i>ΔrpfFΔrpfC-rpfC</i> <sup>S18V</sup> - <i>GUS</i> , M0062 containing a             | This study |
| M0127 | recombinant vector pHM1:: <i>rpfC</i> <sup>S18V</sup> , Rif <sup>r</sup> , Sp <sup>r</sup><br><i>ΔrpfFΔrpfC-rpfC</i> <sup>S18L</sup> - <i>GUS</i> , M0062 containing a recombinant | This study |
| M0128 | vector pHM1:: <i>rpfC</i> <sup>S18L</sup> , Rif <sup>r</sup> , Sp <sup>r</sup><br><i>ΔrpfFΔrpfC-rpfC</i> <sup>S18I</sup> - <i>GUS</i> , M0062 containing a recombinant             | This study |
| M0129 | vector pHM1:: <i>rpfC</i> <sup>S18I</sup> , Rif <sup>r</sup> , Sp <sup>r</sup><br><i>ΔrpfFΔrpfC-rpfC</i> <sup>S18P</sup> - <i>GUS</i> , M0062 containing a recombinant             | This study |
| M0130 | vector pHM1:: <i>rpfC</i> <sup>S18P</sup> , Rif <sup>r</sup> , Sp <sup>r</sup><br><i>ΔrpfFΔrpfC-rpfC</i> <sup>S18F</sup> - <i>GUS</i> , M0062 containing a recombinant             | This study |
| M0131 | vector pHM1:: <i>rpfC</i> <sup>S18F</sup> , Rif <sup>r</sup> , Sp <sup>r</sup><br><i>ΔrpfFΔrpfC-rpfC</i> <sup>S18Y</sup> - <i>GUS</i> , M0062 containing a                         | This study |
| M0132 | recombinant vector pHM1:: <i>rpfC</i> <sup>S18Y</sup> , Rif <sup>r</sup> , Sp <sup>r</sup><br><i>ΔrpfFΔrpfC-rpfC</i> <sup>S18W</sup> - <i>GUS</i> , M0062 containing a             | This study |
| M0133 | recombinant vector pHM1:: <i>rpfC</i> <sup>S18W</sup> , Rif <sup>r</sup> , Sp <sup>r</sup><br><i>ΔrpfFΔrpfC-rpfC</i> <sup>S18C</sup> - <i>GUS</i> , M0062 containing a             | This study |
| M0134 | recombinant vector pHM1:: <i>rpfC</i> <sup>S18C</sup> , Rif <sup>r</sup> , Sp <sup>r</sup><br><i>ΔrpfFΔrpfC-rpfC</i> <sup>S18M</sup> - <i>GUS</i> , M0062 containing a             | This study |
| M0135 | recombinant vector pHM1:: <i>rpfC</i> <sup>S18M</sup> , Rif <sup>r</sup> , Sp <sup>r</sup><br><i>ΔrpfFΔrpfC-rpfC</i> <sup>S18T</sup> - <i>GUS</i> , M0062 containing a recombinant | This study |
| M0136 | vector pHM1:: <i>rpfC</i> <sup>S18T</sup> , Rif <sup>r</sup> , Sp <sup>r</sup><br><i>ΔrpfFΔrpfC-rpfC</i> <sup>L172A</sup> - <i>GUS</i> , M0062 containing a                        | This study |
|       | recombinant vector pHM1:: <i>rpfC</i> <sup>L172A</sup> , Rif <sup>r</sup> , Sp <sup>r</sup>                                                                                        |            |

|                 |                                                                                                                                                        |                |
|-----------------|--------------------------------------------------------------------------------------------------------------------------------------------------------|----------------|
| M0137           | $\Delta rpfF\Delta rpfC-rpfC^{R173A}-GUS$ , M0062 containing a recombinant vector pHM1:: $rpfC^{R173A}$ , Rif <sup>r</sup> , Sp <sup>r</sup>           | This study     |
| M0138           | $\Delta rpfF\Delta rpfC-rpfC^{A174D}-GUS$ , M0062 containing a recombinant vector pHM1:: $rpfC^{A174D}$ , Rif <sup>r</sup> , Sp <sup>r</sup>           | This study     |
| M0139           | $\Delta rpfF\Delta rpfC-rpfC^{M175A}-GUS$ , M0062 containing a recombinant vector pHM1:: $rpfC^{M175A}$ , Rif <sup>r</sup> , Sp <sup>r</sup>           | This study     |
| M0140           | $\Delta rpfF\Delta rpfC-rpfC^{T176A}-GUS$ , M0062 containing a recombinant vector pHM1:: $rpfC^{T176A}$ , Rif <sup>r</sup> , Sp <sup>r</sup>           | This study     |
| M0141           | $\Delta rpfF\Delta rpfC-rpfC^{R177A}-GUS$ , M0062 containing a recombinant vector pHM1:: $rpfC^{R177A}$ , Rif <sup>r</sup> , Sp <sup>r</sup>           | This study     |
| M0142           | $\Delta rpfF\Delta rpfC-rpfC^{A178D}-GUS$ , M0062 containing a recombinant vector pHM1:: $rpfC^{A178D}$ , Rif <sup>r</sup> , Sp <sup>r</sup>           | This study     |
| M0143           | $\Delta rpfF\Delta rpfC-rpfC^{V179A}-GUS$ , M0062 containing a recombinant vector pHM1:: $rpfC^{V179A}$ , Rif <sup>r</sup> , Sp <sup>r</sup>           | This study     |
| M0144           | $\Delta rpfF\Delta rpfC-rpfC^{R180A}-GUS$ , M0062 containing a recombinant vector pHM1:: $rpfC^{R180A}$ , Rif <sup>r</sup> , Sp <sup>r</sup>           | This study     |
| M0145           | $\Delta rpfF\Delta rpfC-rpfC^{E181A}-GUS$ , M0062 containing a recombinant vector pHM1:: $rpfC^{E181A}$ , Rif <sup>r</sup> , Sp <sup>r</sup>           | This study     |
| M0146           | $\Delta rpfF\Delta rpfC-rpfC^{A182D}-GUS$ , M0062 containing a recombinant vector pHM1:: $rpfC^{A182D}$ , Rif <sup>r</sup> , Sp <sup>r</sup>           | This study     |
| M0147           | $\Delta rpfF\Delta rpfC-rpfC^{R183A}-GUS$ , M0062 containing a recombinant vector pHM1:: $rpfC^{R183A}$ , Rif <sup>r</sup> , Sp <sup>r</sup>           | This study     |
| M0148           | $\Delta rpfF\Delta rpfC-rpfC^{H184A}-GUS$ , M0062 containing a recombinant vector pHM1:: $rpfC^{H184A}$ , Rif <sup>r</sup> , Sp <sup>r</sup>           | This study     |
| M0149           | $\Delta rpfF\Delta rpfC-rpfC^{A185D}-GUS$ , M0062 containing a recombinant vector pHM1:: $rpfC^{A185D}$ , Rif <sup>r</sup> , Sp <sup>r</sup>           | This study     |
| M0150           | $\Delta rpfF\Delta rpfC-rpfC^{N186A}-GUS$ , M0062 containing a recombinant vector pHM1:: $rpfC^{N186A}$ , Rif <sup>r</sup> , Sp <sup>r</sup>           | This study     |
| M0151           | $\Delta rpfF\Delta rpfC-rpfC^{Q187A}-GUS$ , M0062 containing a recombinant vector pHM1:: $rpfC^{Q187A}$ , Rif <sup>r</sup> , Sp <sup>r</sup>           | This study     |
| M0152           | $\Delta rpfF\Delta rpfC-rpfC^{D17A-A178D}-GUS$ , M0062 containing a recombinant vector pHM1:: $rpfC^{D17A-A178D}$ , Rif <sup>r</sup> , Sp <sup>r</sup> | This study     |
| M0153           | $\Delta rpfF\Delta rpfC-rpfC^{S18A-A178D}-GUS$ , M0062 containing a recombinant vector pHM1:: $rpfC^{S18A-A178D}$ , Rif <sup>r</sup> , Sp <sup>r</sup> | This study     |
| M0154           | $\Delta rpfF\Delta rpfC-rpfC^{Q22A-A178D}-GUS$ , M0062 containing a recombinant vector pHM1:: $rpfC^{Q22A-A178D}$ , Rif <sup>r</sup> , Sp <sup>r</sup> | This study     |
| M0155           | $\Delta rpfC-rpfC^{S18T}$ , M0033 containing a recombinant vector pHM1:: $rpfC^{S18T}$ , Rif <sup>r</sup> , Sp <sup>r</sup>                            | This study     |
| <b>Plasmids</b> |                                                                                                                                                        |                |
| pK18mob         | Suicide vector used in single-crossover recombination, Kan <sup>r</sup>                                                                                | (1)            |
| pK18mobsacB     | Suicide vector used in double-crossover recombination, Kan <sup>r</sup>                                                                                | (1)            |
| pHM1            | Complementary vector with <i>Plac</i> promoter before MCS, Sp <sup>r</sup>                                                                             | (2)            |
| pHM2            | Complementary vector with no promoter before MCS, Sp <sup>r</sup>                                                                                      | Lab collection |

|                                |                                                                                                                                                  |                |
|--------------------------------|--------------------------------------------------------------------------------------------------------------------------------------------------|----------------|
| pET30a                         | Protein expression vector, Kan <sup>r</sup>                                                                                                      | Novagen        |
| pGEX-6P-1                      | Protein expression vector, Amp <sup>r</sup>                                                                                                      | Lab collection |
| pET30a-RpfC                    | Protein expression vector, pET30a::RpfC, Kan <sup>r</sup> , expressing full-length RpfC                                                          | This study     |
| pET30a-RpfC <sub>Δinput</sub>  | Protein expression vector, pET30a::RpfC <sup>Δinput</sup> , Kan <sup>r</sup> , expressing RpfC without input domain                              | This study     |
| pET30a-RpfC-H657A              | Protein expression vector, pET30a::RpfC <sup>H657A</sup> , Kan <sup>r</sup> , expressing the H198A point mutated protein of RpfC                 | This study     |
| pET30a-RpfC-D512V              | Protein expression vector, pET30a::RpfC <sup>D512V</sup> , Kan <sup>r</sup> , expressing the D512V point mutated protein of RpfC                 | This study     |
| pET30a-RpfC-S3A                | Protein expression vector, pET30a::RpfC <sup>S3A</sup> , Kan <sup>r</sup> , expressing the S3A point mutated protein of RpfC                     | This study     |
| pET30a-RpfC-R15A               | Protein expression vector, pET30a::RpfC <sup>R15A</sup> , Kan <sup>r</sup> , expressing the R15A point mutated protein of RpfC                   | This study     |
| pET30a-RpfC-A16D               | Protein expression vector, pET30a::RpfC <sup>A16D</sup> , Kan <sup>r</sup> , expressing the A16D point mutated protein of RpfC                   | This study     |
| pET30a-RpfC-D17A               | Protein expression vector, pET30a::RpfC <sup>D17A</sup> , Kan <sup>r</sup> , expressing the D17A point mutated protein of RpfC                   | This study     |
| pET30a-RpfC-S18A               | Protein expression vector, pET30a::RpfC <sup>S18A</sup> , Kan <sup>r</sup> , expressing the S18A point mutated protein of RpfC                   | This study     |
| pET30a-RpfC-E19A               | Protein expression vector, pET30a::RpfC <sup>E19A</sup> , Kan <sup>r</sup> , expressing the E19A point mutated protein of RpfC                   | This study     |
| pET30a-RpfC-H20A               | Protein expression vector, pET30a::RpfC <sup>H20A</sup> , Kan <sup>r</sup> , expressing the H20A point mutated protein of RpfC                   | This study     |
| pET30a-RpfC-A21D               | Protein expression vector, pET30a::RpfC <sup>A21D</sup> , Kan <sup>r</sup> , expressing the A21D point mutated protein of RpfC                   | This study     |
| pET30a-RpfC-Q22A               | Protein expression vector, pET30a::RpfC <sup>Q22A</sup> , Kan <sup>r</sup> , expressing the Q22A point mutated protein of RpfC                   | This study     |
| pET30a-RpfC-S18T               | Protein expression vector, pET30a::RpfC <sup>S18T</sup> , Kan <sup>r</sup> , expressing the S18T point mutated protein of RpfC                   | This study     |
| Sensor-GST                     | Protein expression vector, pGEX-6P-1::sensor, Amp <sup>r</sup> , expressing sensor region of RpfC, Amp <sup>r</sup>                              | This study     |
| pET30a-RpfC <sub>Δsensor</sub> | Protein expression vector, pET30a::RpfC <sub>Δsensor</sub> , Kan <sup>r</sup> , expressing full length of RpfC with 22 aa of N terminal deletion | This study     |
| pET30a-RpfG                    | Protein expression vector, pET30a::RpfG, Kan <sup>r</sup> , expressing full-length RpfG                                                          | This study     |
| pET30a-RpfG-D80V               | Protein expression vector, pET30a::RpfG <sup>D80V</sup> , Kan <sup>r</sup> , expressing the D80V point mutated protein of RpfG.                  | This study     |

\* SD sequence: The Shine-Dalgarno (SD) sequence. MCS site: multiple cloning site. Kan<sup>r</sup>: resistant to kanamycin; Raf<sup>r</sup>: resistant to rifamycin; Sp<sup>r</sup>: resistant to spectinomycin.

## References

1. Schafer A, *et al.* (1994) Small mobilizable multi-purpose cloning vectors derived from the *Escherichia coli* plasmids pK18 and pK19: selection of defined deletions in

the chromosome of *Corynebacterium glutamicum*. *Gene* 145(1):69-73.

2. Innes RW, Hirose MA, Kuempel PL (1988) Induction of nitrogen-fixing nodules on clover requires only 32 kilobase pairs of DNA from the *Rhizobium trifolii* symbiosis plasmid. *J Bacteriol* 170(9):3793-3802.
