# Supplementary material for: Fatty acid DSF binds and allosterically activates histidine kinase RpfC of phytopathogenic bacterium Xanthomonas campestris pv. campestris to regulate quorum-sensing and virulence
Source: PubMed Central journal article supplement (PMC5391125; doi:10.1371/journal.ppat.1006304), 2017-04-03
Supplement: ppat.1006304.s007.pdf [file ppat.1006304.s007.pdf]

**S2 Table. Primers used in this study**

| Primer name                                               | Sequence (forward/reverse)                                                                                                              | Length/description                                                                                 |
|-----------------------------------------------------------|-----------------------------------------------------------------------------------------------------------------------------------------|----------------------------------------------------------------------------------------------------|
| <b><math>\Delta</math>rpfF</b>                            | A: AAGCTTCCCAACGAGATCGAAGAC<br>B: GGATCCGGTGGTTCTCCGTGAGAC<br>C: GGATCCAGTCGCGTCGCTCAG<br>D: GCGGAGGAATTCTGAACGCCAGTTC                  | AB 446 bp; CD 363 bp;<br>For $\Delta$ rpfF construction                                            |
| <b><math>\Delta</math>rpfC</b>                            | A: GAATTCGACAGCGAGCACGGTCAA<br>B: TCTAGAAGACTTCATAGACGCCTCAGAC<br>C: TCTAGATAGACCGCCGGCGCATCA<br>D: AAGCTTGCCTAAGCTGCCACACGATCA         | AB 592 bp; CD 459 bp;<br>For $\Delta$ rpfC construction                                            |
| <b>CrpfC</b>                                              | A:GCAAGCTTATGAAGTCTCCATTGCCATG<br>B: GCGTCGACCTATTCGTTGCTACGGGGGG                                                                       | 2181 bp; for $\Delta$ rpfC-rpfC, $\Delta$ rpfF $\Delta$ rpfC-rpfC construction                     |
| <b><math>\Delta</math>rpfF-<math>\Delta</math>rpfC</b>    | A: GAATTCGACAGCGAGCACGGTCAA<br>B: TCTAGAAGACTTCATAGACGCCTCAGAC<br>C:GCTCTAGATGAGGTGGTTCTCCGTGAGAC<br>D: AAGCTTCCCAACGAGATCGAAGAC        | AB 592 bp; CD 446 bp;<br>For $\Delta$ rpfF- $\Delta$ rpfC construction                             |
| <b>PengXcc-GUS-pHM2</b>                                   | A:GCGTCGACTTCGCGCGCAGGCGAG<br>B: GCGGATCCAGAGAACCGGGCTCGAC                                                                              | 254 bp; for pHM2::engXcc-GUS construction                                                          |
| <b><math>\Delta</math>rpfF<math>\Delta</math>rpfC GUS</b> | A:GCGTCGACTTCGCGCGCAGGCGAG<br>B: GCGGATCCAGAGAACCGGGCTCGAC<br>C:GCGGTACCAGGGAGATCACCATGTC<br>D: GCAAGCTTGCATCTGCACGATCATGTCC            | AB 254 bp; CD 235 bp; For $\Delta$ rpfF $\Delta$ rpfC-GUS construction                             |
| <b><math>\Delta</math>sensor</b>                          | A: GCGAATTC GTGCTGATCTTTTGCCGG<br>B: GCCATATG CATAGACGCCTCAGACGCGC<br>C: GCCATATG AATCTGATCCGCATCATC<br>D: GCAAGCTT CAATAAGGAGAAATCAGG  | AB 439 bp; CD 374 bp; For $rpfC^{\Delta$ sensor, $\Delta$ rpfF- $rpfC^{\Delta$ sensor construction |
| <b><math>\Delta</math>TM12</b>                            | A: GCGAATTC GTGCTGATCTTTTGCCGG<br>B: GCCATATG CTGCGCGTGTTCGAATC<br>C: GCCATATG CGACCGCAGGTGTCGCATAC<br>D: GCAAGCTT GAACTCATGGCTCATATTG  | AB 502 bp; CD 384 bp; For $rpfC^{\Delta$ TM1-2}, $\Delta$ rpfF- $rpfC^{\Delta$ TM1-2 construction  |
| <b><math>\Delta</math>TM23</b>                            | A: GCGAATTC CATGGCCACGCTCAGCTTC<br>B: GCCATATG CAAGGTATCGCCGTGGGTG<br>C: GCCATATG GGCAACGGTCTGCGCTATG<br>D: GCAAGCTT CACCTCTCCACCAGCGAC | AB 380 bp; CD 387 bp; For $rpfC^{\Delta$ TM2-3}, $\Delta$ rpfF- $rpfC^{\Delta$ TM2-3 construction  |
| <b><math>\Delta</math>TM34</b>                            | A: GCGAATTC CTTCGAGCACGGAAGGATC<br>B: GCCATATG GGTGCAGGTGTAGTCGAG<br>C: GCCATATG AAAGCCAATCCCTATCTG<br>D: GCAAGCTT CACCTCTCCACCAGCGAC   | AB 333 bp; CD 291 bp; For $rpfC^{\Delta$ TM3-4}, $\Delta$ rpfF- $rpfC^{\Delta$ TM3-4 construction  |
| <b><math>\Delta</math>TM45</b>                            | A: GCGAATTC AATCTGATCCGCATCATC<br>B: GCCATATG GTTGCTGCCATAGCGCAG<br>C: GCCATATG TTACGTGCGATGACCCGTG                                     | AB 306 bp; CD 315 bp; For $rpfC^{\Delta$ TM4-5}, $\Delta$ rpfF- $rpfC^{\Delta$ TM4-5 construction  |

|                                         |                                                                                                                                         |                                                                                                                                                                 |
|-----------------------------------------|-----------------------------------------------------------------------------------------------------------------------------------------|-----------------------------------------------------------------------------------------------------------------------------------------------------------------|
|                                         | D: GCAAGCTT CTGCAGGATCAAGTTGAC                                                                                                          | construction                                                                                                                                                    |
| <b><math>\Delta</math>input</b>         | A: GCGAATTC GTGCTGATCTTTTGCCGG<br>B: GCCATATG CATAGACGCCTCAGACGCGC<br>C: GCCATATG TTACGTGCGATGACCCGTG<br>D: GCAAGCTT CTGCAGGATCAAGTTGAC | AB 439 bp; CD 315 bp; For <i>rpfC</i> <sup><math>\Delta</math>input</sup> , $\Delta$ <i>rpfF</i> - <i>rpfC</i> <sup><math>\Delta</math>input</sup> construction |
| <b>Pro-RpfC<math>\Delta</math>input</b> | A:CGCATATGTTACGTGCGATGACCCGTG<br>B: CGAAGCTTTTCGTTGCTACGGGGGGAG                                                                         | 1668 bp; for protein RpfC <sup><math>\Delta</math>input</sup> expression                                                                                        |
| <b>Pro-RpfCFL</b>                       | A: CATATGAAGTCTCCATTGCCATGG<br>B: AAGCTTTTCGTTGCTACGGGGGGA                                                                              | 2181 bp; for protein RpfC expression                                                                                                                            |
| <b>Pro-H198A</b>                        | A:CTTCCTGGCCAATATGAGCGCTGAGTTCCGCACG<br>B:AGCGCTCATATTGGCCAGGAAGCGGCTCTTGCC                                                             | For the H198A point mutated protein of RpfC expression                                                                                                          |
| <b>Pro-D512V</b>                        | A:GACGCGGTGATTGTGGTCCTGCACATGCCGG<br>B: GACCACAATCACCGCGTCGTAATCCTCTTC                                                                  | For the D512V point mutated protein of RpfC expression                                                                                                          |
| <b>Pro-H657A</b>                        | A:CAACTGCGCGAGAGTGCGGCTGCCTTACGCGGC<br>B: AGCCGCACTCTCGCGCAGTTGTTCCAGTCCGA                                                              | For the H657A point mutated protein of RpfC expression                                                                                                          |
| <b>rpfC-K2A</b>                         | A: CGATTGCAAGCTTATGGCGTCTCCATTGC<br>B: GCCATAAGCTTGCAATCGAATTCCCGC                                                                      | For the recombinant vector pHM1:: <i>rpfC</i> (K2A) construction                                                                                                |
| <b>rpfC-S3A</b>                         | A: GATTGCAAGCTTATGAAGGCTCCATTGCC<br>B: CCTTCATAAGCTTGCAATCGAATTCCCGC                                                                    | For the recombinant vector pHM1:: <i>rpfC</i> (S3A) construction                                                                                                |
| <b>rpfC-P4A</b>                         | A: GATTGCAAGCTTATGAAGTCTGCATTGCCATGG<br>B: CAGACTTCATAAGCTTGCAATCGAATTCCCGC                                                             | For the recombinant vector pHM1:: <i>rpfC</i> (P4A) construction                                                                                                |
| <b>rpfC-L5A</b>                         | A: CAAGCTTATGAAGTCTCCAGCGCCATGGTTG<br>B: GCTGGAGACTTCATAAGCTTGCAATCGAATTC                                                               | For the recombinant vector pHM1:: <i>rpfC</i> (L5A) construction                                                                                                |
| <b>rpfC-P6A</b>                         | A: GCTTATGAAGTCTCCATTGGCATGGTTGAAG<br>B: CCAATGGAGACTTCATAAGCTTGCAATCGA                                                                 | For the recombinant vector pHM1:: <i>rpfC</i> (P6A) construction                                                                                                |
| <b>rpfC-W7A</b>                         | A: TGAAGTCTCCATTGCCAGCGTTGAAGCGG<br>B: GCTGGCAATGGAGACTTCATAAGCTTGCA                                                                    | For the recombinant vector pHM1:: <i>rpfC</i> (W7A) construction                                                                                                |
| <b>rpfC-L8A</b>                         | A: GTCTCCATTGCCATGGGCGAAGCGGCGC<br>B: GCCCATGGCAATGGAGACTTCATAAGCTTG                                                                    | For the recombinant vector pHM1:: <i>rpfC</i> (L8A) construction                                                                                                |

|                  |                                                                       |                                                                      |
|------------------|-----------------------------------------------------------------------|----------------------------------------------------------------------|
| <b>rpfC-K9A</b>  | A: CTCATTGCCATGGTTGGCGCGGCGCCTG<br>B: GCCAACCATGGCAATGGAGACTTCATAAG   | For the recombinant vector pHM1::<br><i>rpfC</i> (K9A) construction  |
| <b>rpfC-R10A</b> | A: CATTGCCATGGTTGAAGGCGCGCCTGTCAG<br>B: GCCTTCAACCATGGCAATGGAGACTTCAT | For the recombinant vector pHM1::<br><i>rpfC</i> (R10A) construction |
| <b>rpfC-R11A</b> | A: GCCATGGTTGAAGCGGGCCCTGTCAGGG<br>B: GCCCGCTTCAACCATGGCAATGGAGACT    | For the recombinant vector pHM1::<br><i>rpfC</i> (R11A) construction |
| <b>rpfC-L12A</b> | A: CATGGTTGAAGCGGCGCGTCAGGGCGAG<br>B: GCGCGCCGCTTCAACCATGGCAATGGAGAC  | For the recombinant vector pHM1::<br><i>rpfC</i> (L12A) construction |
| <b>rpfC-S13A</b> | A:GGTTGAAGCGGCGCCTGGCAGGGCGAGC<br>B: CCAGGCGCCGCTTCAACCATGGCAATGG     | For the recombinant vector pHM1::<br><i>rpfC</i> (S13A) construction |
| <b>rpfC-G14A</b> | A: GAAGCGGCGCCTGTCAGCGCGAGCAGATTC<br>B: GCTGACAGGCGCCGCTTCAACCATGGCA  | For the recombinant vector pHM1::<br><i>rpfC</i> (G14A) construction |
| <b>rpfC-R15A</b> | A: GCGGCGCCTGTCAGGGGCAGCAGATTCG<br>B: GCCCCTGACAGGCGCCGCTTCAACCATG    | For the recombinant vector pHM1::<br><i>rpfC</i> (R15A) construction |
| <b>rpfC-A16D</b> | A: GCGCCTGTCAGGGCGAGACGATTCGGAAC<br>B: GTCTCGCCCTGACAGGCGCCGCTTCAACC  | For the recombinant vector pHM1::<br><i>rpfC</i> (A16D) construction |
| <b>rpfC-D17A</b> | A: CCTGTCAGGGCGAGCAGCTTCGGAACAC<br>B: GCTGCTCGCCCTGACAGGCGCCGCTTCAAC  | For the recombinant vector pHM1::<br><i>rpfC</i> (D17A) construction |
| <b>rpfC-S18A</b> | A: CTGTCAGGGCGAGCAGATGCGGAACACGC<br>B: CATCTGCTCGCCCTGACAGGCGCCGCTTC  | For the recombinant vector pHM1::<br><i>rpfC</i> (S18A) construction |
| <b>rpfC-E19A</b> | A: CAGGGCGAGCAGATTCGGCACACGCGCAG<br>B: GCCGAATCTGCTCGCCCTGACAGGCGCCG  | For the recombinant vector pHM1::<br><i>rpfC</i> (E19A) construction |
| <b>rpfC-H20A</b> | A: GCGAGCAGATTCGGAAGCCGCGCAGAATC                                      | For the recombinant                                                  |

|                  |                                                                         |                                                                            |
|------------------|-------------------------------------------------------------------------|----------------------------------------------------------------------------|
|                  | B: GCTTCCGAATCTGCTCGCCCTGACAGGC                                         | vector pHM1::<br><i>rpfC</i> (H20A)<br>construction                        |
| <b>rpfC-A21D</b> | A: GAGCAGATTCGGAACACGACCAGAATCTGA<br>B: GTCGTGTTCCGAATCTGCTCGCCCTGACAG  | For the recombinant<br>vector pHM1::<br><i>rpfC</i> (A21D)<br>construction |
| <b>rpfC-Q22A</b> | A: AGATTCGGAACACGCGGCGAATCTGATC<br>B: GCCGCGTGTTCCGAATCTGCTCGCCCTG      | For the recombinant<br>vector pHM1::<br><i>rpfC</i> (Q22A)<br>construction |
| <b>Pro-S3A</b>   | A: TTAAGAAGGAGATATACATATGATGAAGG<br>B: GGCAATGGAGCCTTCATCATATGTATATC    | For the S3A point<br>mutated protein of<br>RpfC expression                 |
| <b>rpfC-R15K</b> | A: AAGCGGCGCCTGTCAGGGAAAGCAGATTCG<br>B: TTCCCTGACAGGCGCCGCTTCAACCATGGC  | For the recombinant<br>vector pHM1::<br><i>rpfC</i> (R15K)<br>construction |
| <b>rpfC-R15H</b> | A: AGCGGCGCCTGTCAGGGCATGCAGATTCGG<br>B: ATGCCCTGACAGGCGCCGCTTCAACCATGG  | For the recombinant<br>vector pHM1::<br><i>rpfC</i> (R15H)<br>construction |
| <b>rpfC-A16V</b> | A: GGC GCCTGTCAGGGCGAGTAGATTCGGAA<br>B: ACTCGCCCTGACAGGCGCCGCTTCAACCA   | For the recombinant<br>vector pHM1::<br><i>rpfC</i> (A16V)<br>construction |
| <b>rpfC-A16G</b> | A: GGC GCCTGTCAGGGCGAGGAGATTCGGAAC<br>B: CCTCGCCCTGACAGGCGCCGCTTCAACCA  | For the recombinant<br>vector pHM1::<br><i>rpfC</i> (A16G)<br>construction |
| <b>rpfC-D17E</b> | A: GCCTGTCAGGGCGAGCAGAATCGGAACACG<br>B: TTCTGCTCGCCCTGACAGGCGCCGCTTCAAC | For the recombinant<br>vector pHM1::<br><i>rpfC</i> (D17E)<br>construction |
| <b>rpfC-D17N</b> | A: CGCCTGTCAGGGCGAGCAAATTCGGAACAC<br>B: TTGCTCGCCCTGACAGGCGCCGCTTCAAC   | For the recombinant<br>vector pHM1::<br><i>rpfC</i> (D17N)<br>construction |
| <b>rpfC-E19D</b> | A: GGGCGAGCAGATTCGGACCACGCGCAGA<br>B: GTCCGAATCTGCTCGCCCTGACAGGCGC      | For the recombinant<br>vector pHM1::<br><i>rpfC</i> (E19D)<br>construction |
| <b>rpfC-E19Q</b> | A: TCAGGGCGAGCAGATTCGCAACACGCGCAG<br>B: GCGAATCTGCTCGCCCTGACAGGCGCCG    | For the recombinant<br>vector pHM1::                                       |

|                  |                                                                          |                                                                            |
|------------------|--------------------------------------------------------------------------|----------------------------------------------------------------------------|
|                  |                                                                          | <i>rpfC</i> (E19Q)<br>construction                                         |
| <b>rpfC-A21V</b> | A: GAGCAGATTCGGAACACGTCCAGAATCTGA<br>B: GACGTGTTCCGAATCTGCTCGCCCTGACAG   | For the recombinant<br>vector pHM1::<br><i>rpfC</i> (A21V)<br>construction |
| <b>rpfC-A21G</b> | A: GAGCAGATTCGGAACACGGGCAGAATCTG<br>B: CCGTGTTCGAATCTGCTCGCCCTGACAG      | For the recombinant<br>vector pHM1::<br><i>rpfC</i> (A21G)<br>construction |
| <b>rpfC-Q22N</b> | A: GCAGATTCGGAACACGCGAACAATCTGATCC<br>B: GTTCGCGTGTTCGAATCTGCTCGCCCTGAC  | For the recombinant<br>vector pHM1::<br><i>rpfC</i> (Q22N)<br>construction |
| <b>rpfC-Q22E</b> | A: GCAGATTCGGAACACGCGGAGAATCTGATC<br>B: CCGCGTGTTCGAATCTGCTCGCCCTGAC     | For the recombinant<br>vector pHM1::<br><i>rpfC</i> (Q22E)<br>construction |
| <b>rpfC-S18N</b> | A: CTGTCAGGGCGAGCAGATAACGAACACGCGC<br>B: GTTATCTGCTCGCCCTGACAGGCGCCGCTTC | For the recombinant<br>vector pHM1::<br><i>rpfC</i> (S18N)<br>construction |
| <b>rpfC-S18Q</b> | A: CTGTCAGGGCGAGCAGATCAAGAACACGCGC<br>B: TTGATCTGCTCGCCCTGACAGGCGCCGCTTC | For the recombinant<br>vector pHM1::<br><i>rpfC</i> (S18Q)<br>construction |
| <b>rpfC-S18D</b> | A: CTGTCAGGGCGAGCAGATGACGAACACGCGC<br>B: GTCATCTGCTCGCCCTGACAGGCGCCGCTTC | For the recombinant<br>vector pHM1::<br><i>rpfC</i> (S18D)<br>construction |
| <b>rpfC-S18E</b> | A: CTGTCAGGGCGAGCAGATGAAGAACACGCGC<br>B: TTCATCTGCTCGCCCTGACAGGCGCCGCTTC | For the recombinant<br>vector pHM1::<br><i>rpfC</i> (S18E)<br>construction |
| <b>rpfC-S18K</b> | A: CTGTCAGGGCGAGCAGATAAAGAACACGCGC<br>B: TTTATCTGCTCGCCCTGACAGGCGCCGCTTC | For the recombinant<br>vector pHM1::<br><i>rpfC</i> (S18K)<br>construction |
| <b>rpfC-S18R</b> | A: CTGTCAGGGCGAGCAGATCGCGAACACGCGC<br>B: GCGATCTGCTCGCCCTGACAGGCGCCGCTTC | For the recombinant<br>vector pHM1::<br><i>rpfC</i> (S18R)<br>construction |
| <b>rpfC-S18H</b> | A: CTGTCAGGGCGAGCAGATCACGAACACGCGC<br>B: GTGATCTGCTCGCCCTGACAGGCGCCGCTTC | For the recombinant<br>vector pHM1::<br><i>rpfC</i> (S18H)                 |

|                  |                                                                           |                                                                                            |
|------------------|---------------------------------------------------------------------------|--------------------------------------------------------------------------------------------|
| <b>rpfC-S18G</b> | A: CTGTCAGGGCGAGCAGATGGGGAACACGCG<br>B: CCATCTGCTCGCCCTGACAGGCGCCGCTTC    | construction<br>For the recombinant<br>vector pHM1::<br><i>rpfC</i> (S18G)<br>construction |
| <b>rpfC-S18V</b> | A: CTGTCAGGGCGAGCAGATGTCGAACACGCGC<br>B: GACATCTGCTCGCCCTGACAGGCGCCGCTTC  | For the recombinant<br>vector pHM1::<br><i>rpfC</i> (S18V)<br>construction                 |
| <b>rpfC-S18L</b> | A: CTGTCAGGGCGAGCAGATCTCGAACACGCGC<br>B: GAGATCTGCTCGCCCTGACAGGCGCCGCTTC  | For the recombinant<br>vector pHM1::<br><i>rpfC</i> (S18L)<br>construction                 |
| <b>rpfC-S18I</b> | A: CTGTCAGGGCGAGCAGATATCGAACACGCGC<br>B: GATATCTGCTCGCCCTGACAGGCGCCGCTTC  | For the recombinant<br>vector pHM1::<br><i>rpfC</i> (S18I)<br>construction                 |
| <b>rpfC-S18P</b> | A: CTGTCAGGGCGAGCAGATCCCGAACACGCGC<br>B: GGGATCTGCTCGCCCTGACAGGCGCCGCTTC  | For the recombinant<br>vector pHM1::<br><i>rpfC</i> (S18P)<br>construction                 |
| <b>rpfC-S18F</b> | A: CTGTCAGGGCGAGCAGATTTTCGAACACGCGC<br>B: GAAATCTGCTCGCCCTGACAGGCGCCGCTTC | For the recombinant<br>vector pHM1::<br><i>rpfC</i> (S18F)<br>construction                 |
| <b>rpfC-S18Y</b> | A: CTGTCAGGGCGAGCAGATTACGAACACGCGC<br>B: GTAATCTGCTCGCCCTGACAGGCGCCGCTTC  | For the recombinant<br>vector pHM1::<br><i>rpfC</i> (S18Y)<br>construction                 |
| <b>rpfC-S18W</b> | A: CTGTCAGGGCGAGCAGATTGGGGAACACGCGC<br>B: CCAATCTGCTCGCCCTGACAGGCGCCGCTTC | For the recombinant<br>vector pHM1::<br><i>rpfC</i> (S18W)<br>construction                 |
| <b>rpfC-S18C</b> | A: CTGTCAGGGCGAGCAGATTGCGAACACGCGC<br>B: GCAATCTGCTCGCCCTGACAGGCGCCGCTTC  | For the recombinant<br>vector pHM1::<br><i>rpfC</i> (S18C)<br>construction                 |
| <b>rpfC-S18M</b> | A: CTGTCAGGGCGAGCAGATATGGAACACGCGC<br>B: CATATCTGCTCGCCCTGACAGGCGCCGCTTC  | For the recombinant<br>vector pHM1::<br><i>rpfC</i> (S18M)<br>construction                 |
| <b>rpfC-S18T</b> | A: CTGTCAGGGCGAGCAGATACGGAACACGC<br>B: TATCTGCTCGCCCTGACAGGCGCCGCTTC      | For the recombinant<br>vector pHM1::<br><i>rpfC</i> (S18T)<br>construction                 |

|                   |                                                                                     |                                                                       |
|-------------------|-------------------------------------------------------------------------------------|-----------------------------------------------------------------------|
| <b>rpfC-L172A</b> | A: CTGTA <del>CT</del> TCGACTCGCTGGCACGTGCGATG<br>B: GCCAGCGAGTCGAAGTACAGCGGCACCGCA | For the recombinant vector pHM1::<br><i>rpfC</i> (L172A) construction |
| <b>rpfC-R173A</b> | A: TACTTCGACTCGCTGTTAGCTGCGATGACC<br>B: CGTAACAGCGAGTCGAAGTACAGCGGCACC              | For the recombinant vector pHM1::<br><i>rpfC</i> (R173A) construction |
| <b>rpfC-A174D</b> | A: TCGACTCGCTGTTACGTGACATGACCCGTG<br>B: GTCACGTAACAGCGAGTCGAAGTACAGCGG              | For the recombinant vector pHM1::<br><i>rpfC</i> (A174D) construction |
| <b>rpfC-M175A</b> | A: GACTCGCTGTTACGTGCGGCGACCCGTGCA<br>B: GCCGCACGTAACAGCGAGTCGAAGTACAGC              | For the recombinant vector pHM1::<br><i>rpfC</i> (M175A) construction |
| <b>rpfC-T176A</b> | A: TCGCTGTTACGTGCGATGGCCCGTGCAGT<br>B: CCATCGCACGTAACAGCGAGTCGAAGTAC                | For the recombinant vector pHM1::<br><i>rpfC</i> (T176A) construction |
| <b>rpfC-R177A</b> | A: CTGTTACGTGCGATGACCGCTGCAGTGCGC<br>B: GCGGTCATCGCACGTAACAGCGAGTCGAAG              | For the recombinant vector pHM1::<br><i>rpfC</i> (R177A) construction |
| <b>rpfC-A178D</b> | A: TACGTGCGATGACCCGTGACGTGCGCGAAG<br>B: GTCACGGGTCATCGCACGTAACAGCGAGTC              | For the recombinant vector pHM1::<br><i>rpfC</i> (A178D) construction |
| <b>rpfC-V179A</b> | A: GTGCGATGACCCGTGCAGCGCGCGAAGCC<br>B: GCTGCACGGGTCATCGCACGTAACAGCGA                | For the recombinant vector pHM1::<br><i>rpfC</i> (V179A) construction |
| <b>rpfC-R180A</b> | A: GCGATGACCCGTGCAGTGGCCGAAGCCCGG<br>B: GCCACTGCACGGGTCATCGCACGTAACAGC              | For the recombinant vector pHM1::<br><i>rpfC</i> (R180A) construction |
| <b>rpfC-E181A</b> | A: TGACCCGTGCAGTGCAGCGCAGCCCGGCAC<br>B: GCGCGCACTGCACGGGTCATCGCACGTA                | For the recombinant vector pHM1::<br><i>rpfC</i> (E181A) construction |
| <b>rpfC-A182D</b> | A: CCCGTGCAGTGCAGCGAAGACCGGCACGCC<br>B: TCTTCGCGCACTGCACGGGTCATCGCACG               | For the recombinant vector pHM1::<br><i>rpfC</i> (A182D) construction |
| <b>rpfC-R183A</b> | A: CGTGCAGTGCAGCGAAGCCGCGCACGCCAAC                                                  | For the recombinant                                                   |

|                                          |                                                                         |                                                                             |
|------------------------------------------|-------------------------------------------------------------------------|-----------------------------------------------------------------------------|
|                                          | B: GCGGCTTCGCGCACTGCACGGGTCATCGCA                                       | vector pHM1::<br><i>rpfC</i> (R183A)<br>construction                        |
| <b>rpfC-H184A</b>                        | A: GCAGTGCGCGAAGCCCGGGCCGCAACCAG<br>B: GCCCGGGCTTCGCGCACTGCACGGGTCATC   | For the recombinant<br>vector pHM1::<br><i>rpfC</i> (H184A)<br>construction |
| <b>rpfC-A185D</b>                        | A: TGCGCGAAGCCCGGCACGACAACCAGGCC<br>B: TCGTGCCGGGCTTCGCGCACTGCACGGGT    | For the recombinant<br>vector pHM1::<br><i>rpfC</i> (A185D)<br>construction |
| <b>rpfC-N186A</b>                        | A: CGCGAAGCCCGGCACGCCGCCAGGCCAAG<br>B: GCGGCGTGCCGGGCTTCGCGCACTGCACGG   | For the recombinant<br>vector pHM1::<br><i>rpfC</i> (N186A)<br>construction |
| <b>rpfC-Q187A</b>                        | A: GAAGCCCGGCACGCCAACGCGGCCAAGAGC<br>B: GCGTTGGCGTGCCGGGCTTCGCGCACTGCA  | For the recombinant<br>vector pHM1::<br><i>rpfC</i> (Q187A)<br>construction |
| <b>Pro-RpfC<math>\Delta</math>sensor</b> | A: GCCATATGAATCTGATCCGCATCATCATCACC<br>B: GCGTCGACTTCGTTGCTACGGGGGAG    | 2115 bp; for protein<br>RpfC $\Delta$ sensor<br>expression                  |
| <b>Pro-Sensor-GST</b>                    | A: GCGGATCCATGAAGTCTCCATTGCC<br>B: GCGTCGACTCACTGCGCGTGTTCCGAATC        | 69 bp; for protein<br>Sensor-GST<br>expression                              |
| <b>Pro-RpfGFL</b>                        | A: CATATGCAGGATGTTTTAGGGAAT<br>B: AAGCTTCACCCAGGACGCGCCGA               | 1137 bp; for protein<br>RpfG expression                                     |
| <b>Pro-RpfGD80V</b>                      | A: GGATCTGTTGCTGCTCGTGTACCGGATGCC<br>B: CACGAGCAGCAACAGATCCACGCGACCAGCT | For the D80V point<br>mutated protein of<br>RpfG expression                 |
